# Supplementary material for: Zwitterionic surfactant assisted fabrication of mesoporous silica coated carbon nanotubes for organic pollutants
Source: Royal Society of Chemistry journal article supplement (doi:10.1039/c3nj01387a), 2014-01-01
Supplement: c3nj01387a1.pdf [file c3nj01387a1.pdf]

## ELECTRONIC SUPPLEMENTARY INFORMATION

### Zwitterionic Surfactant Assistant Fabrication of Mesoporous Silica Coated Carbon Nanotube for Organic Pollutants

Min Zhang<sup>a</sup>, Jing Zheng<sup>a</sup>, Peixiong Xia<sup>a</sup>, Yue Zheng<sup>a</sup>, Jingli Xu<sup>\*a</sup>, Langxing Chen<sup>\*b</sup>, Xiwen He<sup>b</sup>, and Qunling Fang<sup>\*c</sup>

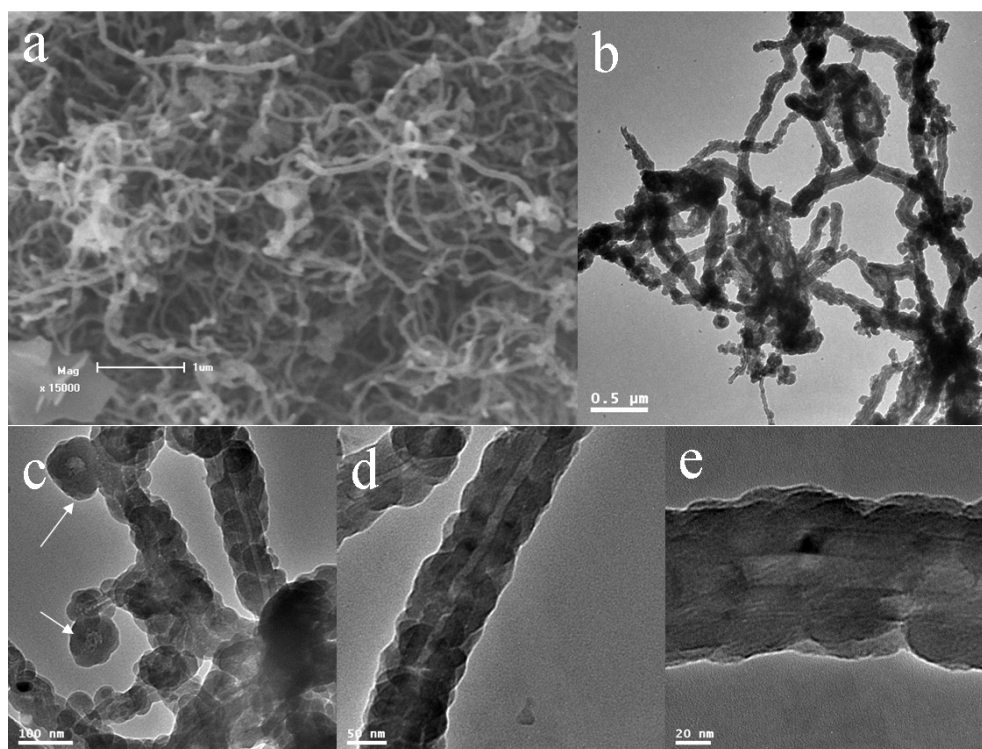

**Figs. S1(a-e) SEM and TEM image of CNTs@SiO<sub>2</sub> using phospholipids(0.4 g), TEOS(500 uL) at different magnification**

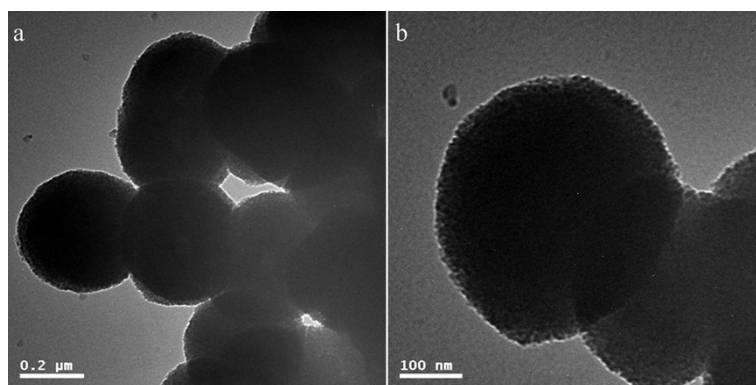

**Figs. S2(a-b)** TEM image of SiO<sub>2</sub> spheres without CNTs as template at different magnification

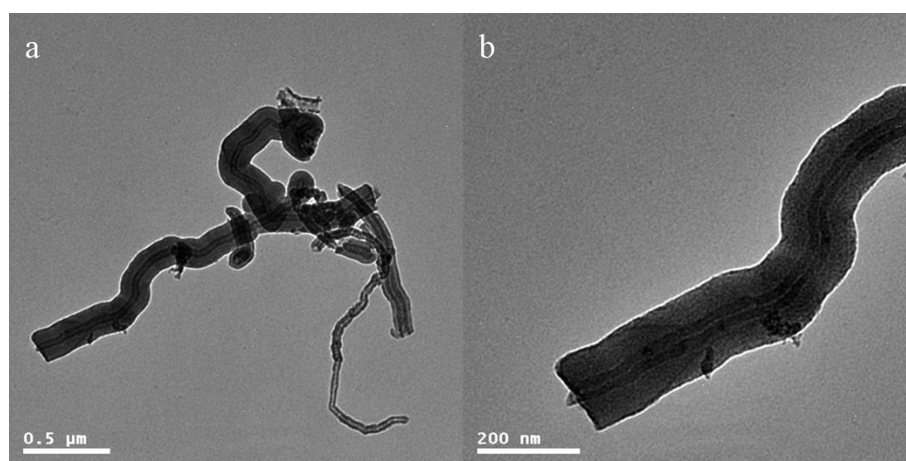

**Figs. S3(a-b)** TEM image of CNTs@SiO<sub>2</sub> using CTAB(0.2 g) at different magnification

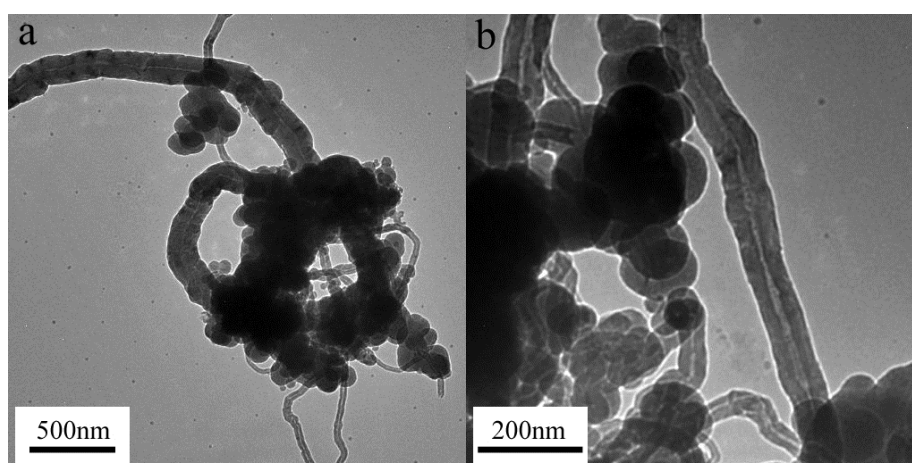

**Fig. S4(a-b)** TEM image of CNTs@SiO<sub>2</sub> using anionic surfactant(SDS) in the absence of APTES at different magnification

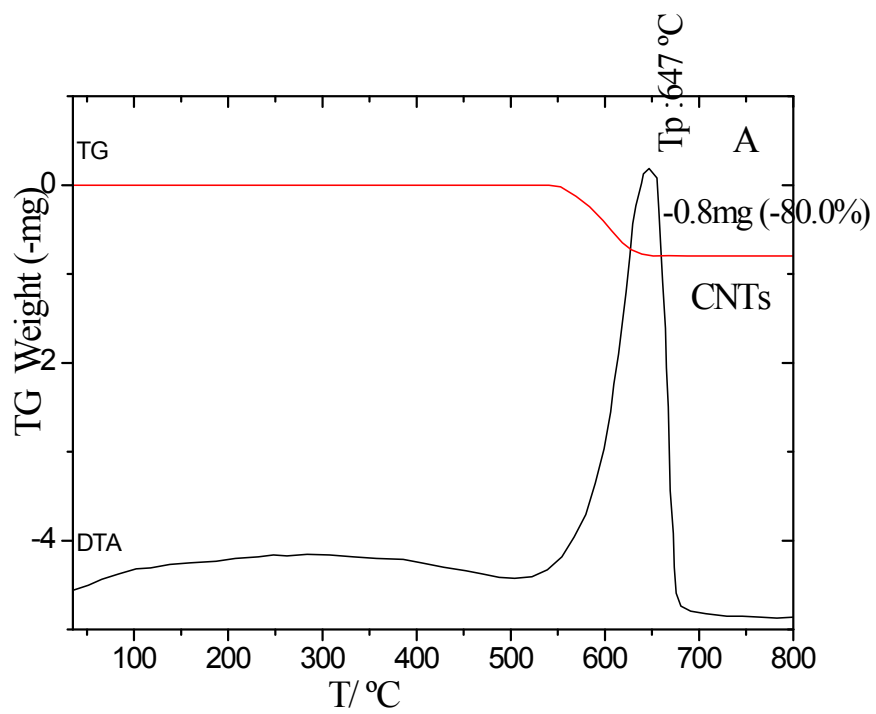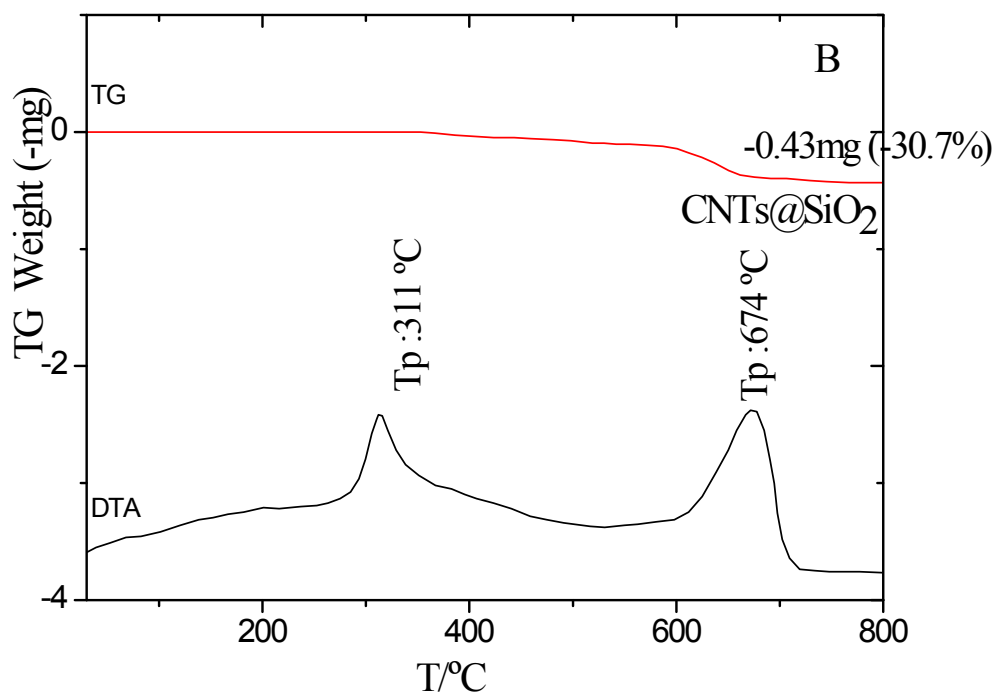

**Fig. S5** TG/DSC data of the pristine CNTs (a) and CNTs@SDS@SiO<sub>2</sub> (b) respectively.

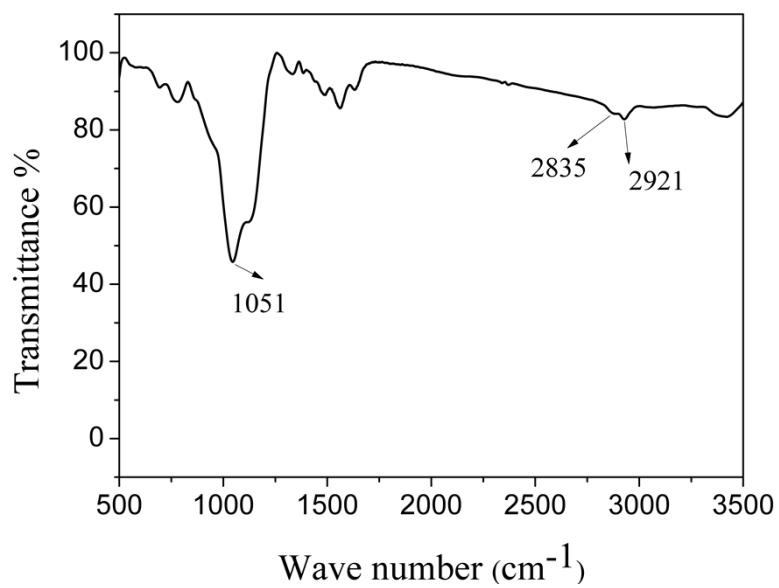

**Fig. S6.** FT-IR spectrum of as-prepared CNTs@SDS@SiO<sub>2</sub> composite using SDS surfactant

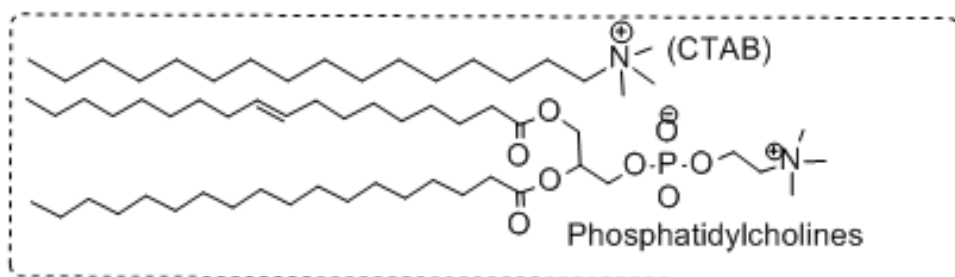

**Fig. S7.** The chemical structure of CTAB and Phosphatidylcholines

Table S1

BET specific surface values, BJH pore size and pore volume calculated from the N<sub>2</sub> adsorption/desorption isotherms for the materials used in this work.

| Sample                                     | BJH pore size/nm | BET Surface area/m <sup>2</sup> g <sup>-1</sup> | Pore Volume/m <sup>3</sup> g <sup>-1</sup> |
|--------------------------------------------|------------------|-------------------------------------------------|--------------------------------------------|
| CNTs@SiO <sub>2</sub> (P)                  | 14.27            | 187.31                                          | 0.67                                       |
| CNTs@SiO <sub>2</sub> (P/C 3:1)            | 3.95             | 413.24                                          | 0.41                                       |
| CNTs@SiO <sub>2</sub> (P/C 2:2)            | 2.92             | 644.85                                          | 0.47                                       |
| CNTs@SiO <sub>2</sub> ((P/C1:3)            | 2.51             | 784.55                                          | 0.49                                       |
| CNTs@SiO <sub>2</sub> (C-extraction)       | 2.72             | 831.00                                          | 0.56                                       |
| CNTs@SDS@SiO <sub>2</sub><br>(calcination) | 4.71             | 207.84                                          | 0.24                                       |
| CNTs@SDS@SiO <sub>2</sub><br>(extraction)  | 2.18             | 615.03                                          | 0.33                                       |

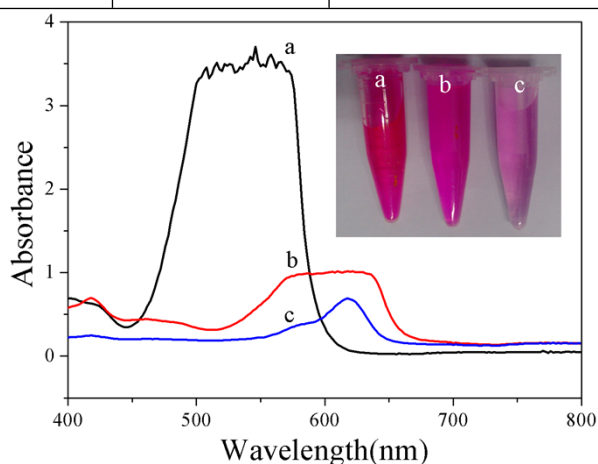

Fig. S8 Absorption spectra of a solution of Rhodamine B absorption of RB with the CNTs@Phospholipids@SiO<sub>2</sub> and the mesoporous CNTs@SiO<sub>2</sub>(P) respectively: (a) 0 minutes; (b) after mixing with CNTs@Phospholipids@SiO<sub>2</sub> for 60 minutes; (c) after mixing with the mesoporous CNTs@SiO<sub>2</sub>(P) for 60 minutes; (Inset imagine) Photos of absorption of RB with the CNTs@Phospholipids@SiO<sub>2</sub> and the mesoporous CNTs@SiO<sub>2</sub>(P) respectively: (a) 0 minutes; (b) after mixing with CNTs@Phospholipids@SiO<sub>2</sub> for 60 minutes; (c) after mixing with the mesoporous CNTs @SiO<sub>2</sub>(P) for 60 minutes;
